# Supplementary material
Source: PubMed Central journal article supplement (PMC4618322)
Supplement: NIHMS730178-supplement-supplemental_material.pdf [file NIHMS730178-supplement-supplemental_material.pdf]

Cite this: DOI: 10.1039/c0xx00000x

www.rsc.org/xxxxxx

---

## Electronic Supplementary Information

### Systematic evaluation of natural scaffolds in cutaneous wound healing

5 Cynthia Cam,<sup>a</sup> Suwei Zhu,<sup>b</sup> , Norman F. Truong,<sup>b</sup> Philip O. Scumpia<sup>c</sup> and Tatiana Segura<sup>b\*</sup>

Received (in XXX, XXX) Xth XXXXXXXXXX 20XX, Accepted Xth XXXXXXXXXX 20XX

DOI: 10.1039/b000000x

10 <sup>a</sup> Department of Bioengineering, University of California at Los Angeles, 420 Westwood Plaza, Los Angeles, CA, 90095 USA. Fax: +1(310)206-4107; Tel: +1(310)794-42248; E-mail: [cycam@g.ucla.edu](mailto:cycam@g.ucla.edu)

<sup>b</sup> Department of Chemical and Biomolecular Engineering, University of California at Los Angeles, 420 Westwood Plaza, Los Angeles, CA, 90095 USA. Fax: +1(310)206-4107; Tel: +1(310)794-42248

<sup>c</sup> Department of Medicine, Division of Dermatology, University of California at Los Angeles, 52-121 CHS, Los Angeles, CA, 90095 USA. Fax: +1(310)206-9878; Tel: +1(310)825-1531

15 <sup>b\*</sup> Department of Chemical and Biomolecular Engineering, University of California at Los Angeles, 420 Westwood Plaza, Los Angeles, CA, 90095 USA. Fax: +1(310)206-4107; Tel: +1(310)206-3980; E-mail: [tsegura@g.ucla.edu](mailto:tsegura@g.ucla.edu)

Table 1. Scoring of epidermis/re-epithelialization

| Score | Criteria                                                          |
|-------|-------------------------------------------------------------------|
| 0     | No migration.                                                     |
| 1     | Minimal re-epithelialization (<10%).                              |
| 2     | Partial re-epithelialization (incomplete closure).                |
| 3     | Complete re-epithelialization without keratin layer formation.    |
| 4     | Complete/thick re-epithelialization with keratin layer formation. |

Table 2. Scoring of granulation tissue/vascularization

| Score | Criteria                                                     |
|-------|--------------------------------------------------------------|
| 0     | No granulation tissue.                                       |
| 1     | Early granulation tissue, no vascularization.                |
| 2     | Mature granulation tissue, early vascularization.            |
| 3     | Mature granulation tissue with mature blood vessel formation |

Table 3. Scoring of collagen deposition/fibroplasia

| Score | Criteria                                                                                                     |
|-------|--------------------------------------------------------------------------------------------------------------|
| 0     | No collagen deposition/fibroplasias.                                                                         |
| 1     | Fibroblast proliferation/no collagen deposition.                                                             |
| 2     | Fibroblast proliferation with minimal collagen deposition.                                                   |
| 3     | Fibroblast proliferation with extensive haphazard collagen deposition.                                       |
| 4     | Extensive organized collagen deposition or complete replacement of dermis with fibrous tissue (mature scar). |

5

Table 4. Scoring of inflammation

| Score | Criteria                                                                     |
|-------|------------------------------------------------------------------------------|
| 0     | No inflammatory cells.                                                       |
| 1     | 1-50 leukocytes per high power field.                                        |
| 2     | 51-100 leukocytes per high power field.                                      |
| 3     | 101-250 leukocytes per high power field.                                     |
| 4     | ≥250 leukocytes per high power field or microabscesses or abscesses present. |

---

Supplementary Figures

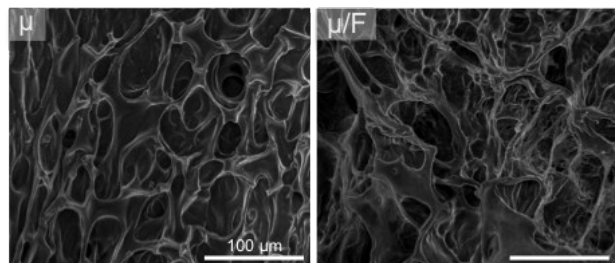

**S1.** Scanning electron micrographs show the porous structure of  $\mu$  gels while the pores are coated with fibrillar fibrin in  $\mu/F$  gels.
